# Supplementary material for: Protein patterns template arrays of magnetic nanoparticles
Source: Royal Society of Chemistry journal article supplement (doi:10.1039/c6ra07662a), 2016-01-01
Supplement: c6ra07662a1.pdf [file c6ra07662a1.pdf]

## Supplementary

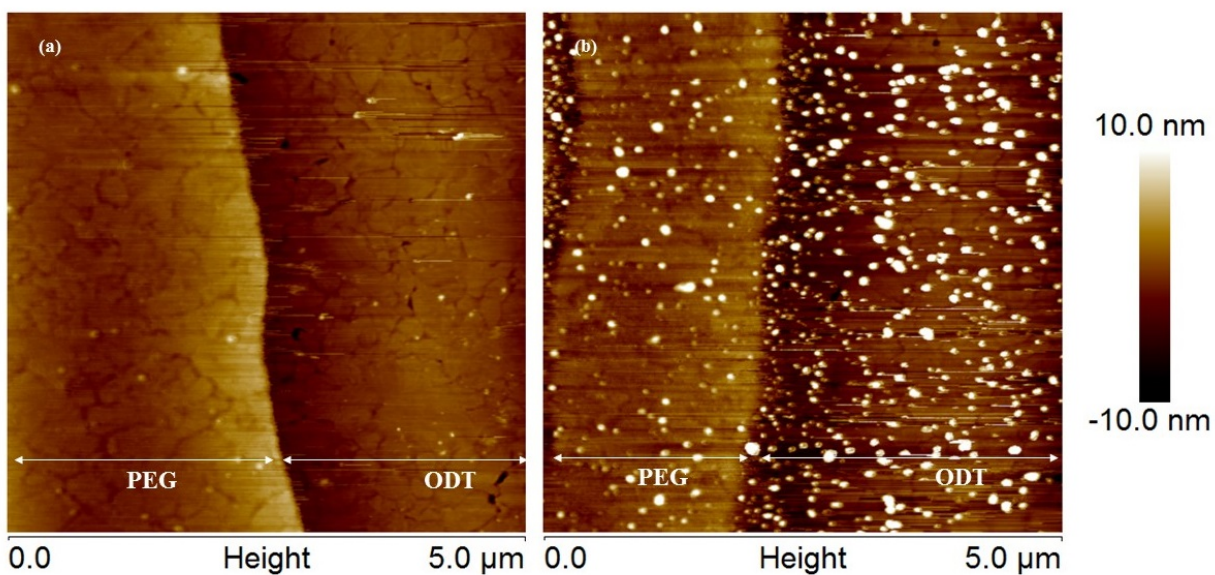

**Figure 11** Tapping mode AFM of ODT-PEG patterned surface treated with buffer (a) and BSA (b)

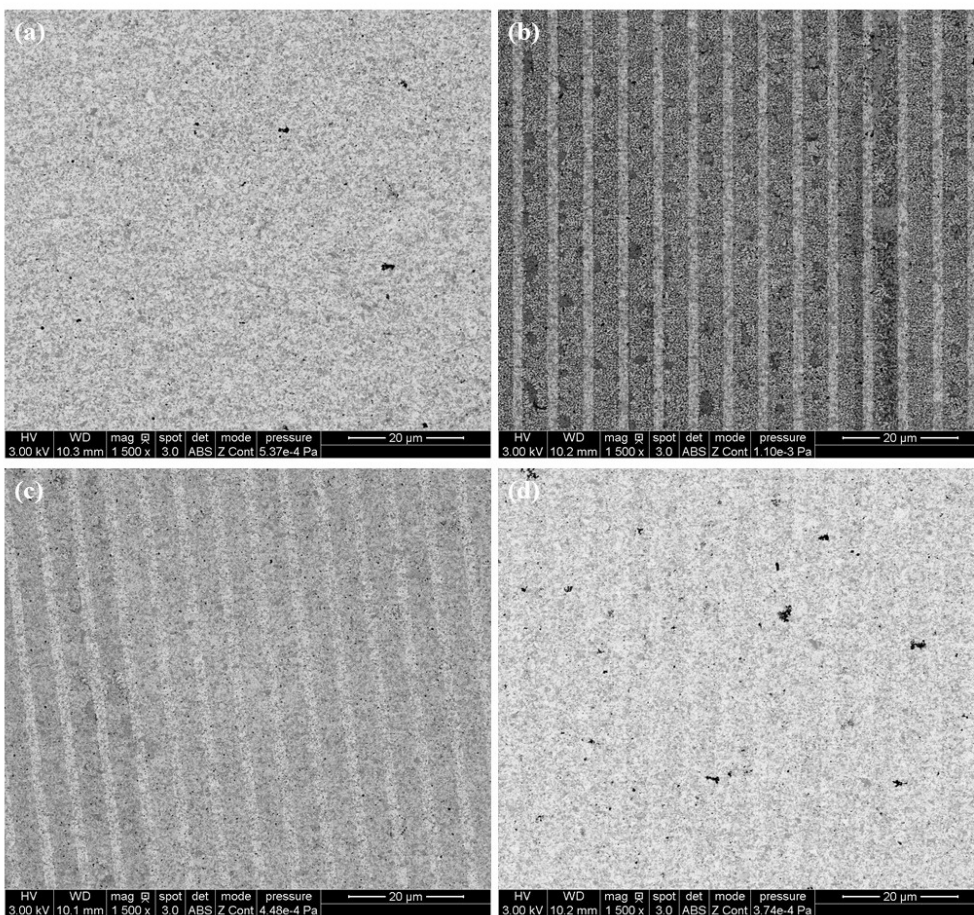

**Figure 12** Backscattered electron images of magnetite co-precipitated on ODT-PEG patterned surfaces treated with (a) buffer, (b) Mms6, (c) m2Mms6 and (d) BSA.
